# Supplementary material for: Tuning Paclitaxel Release Behavior Using Dually-Responsive Nanomicellar Assemblies with Multiple Diselenide/Disulfide Linkages
Source: Research Square preprint supplement (doi:10.21203/rs.3.rs-936666/v1), 2021-10-01

**Graphic abstract:**

The nanomicellar assemblies composed of thermal and redox dually-responsive copolymers with multiple diselenide/disulfide linkages polyethylene glycol-*alt*-diselenodipropionate/disulfhydryldipropionate-*b*-poly(N-isopropylacrylamide) were developed, which can realize PTX on-demand release.


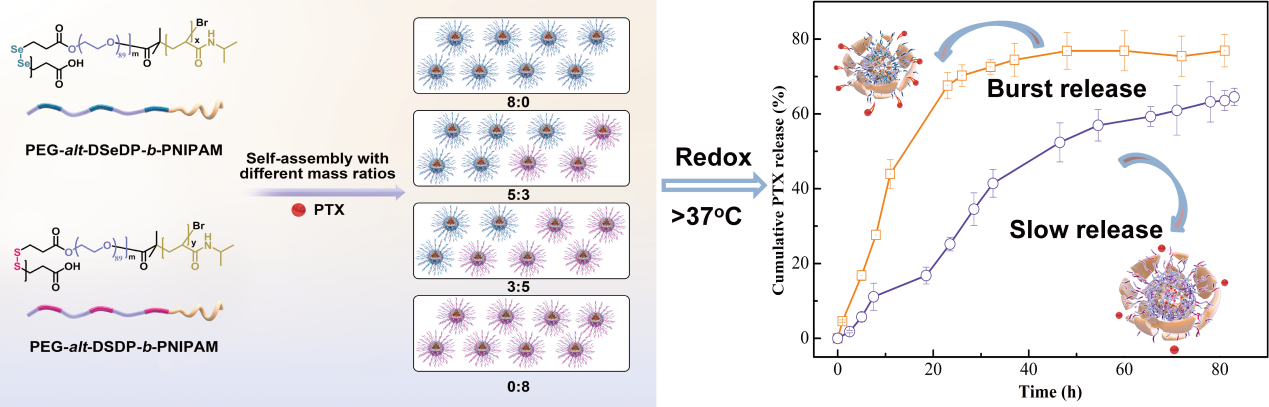

Supplement: Supplementary file 1 [file 82cdc707996e084a84e10d13.docx]
